# Supplementary material for: Hyperdominance in Amazonian forest carbon cycling
Source: PubMed Central journal article supplement (PMC4423203; doi:10.1038/ncomms7857), 2015-04-28
Supplement: ncomms7857-s1.pdf [file ncomms7857-s1.pdf]

## Supplementary Figures

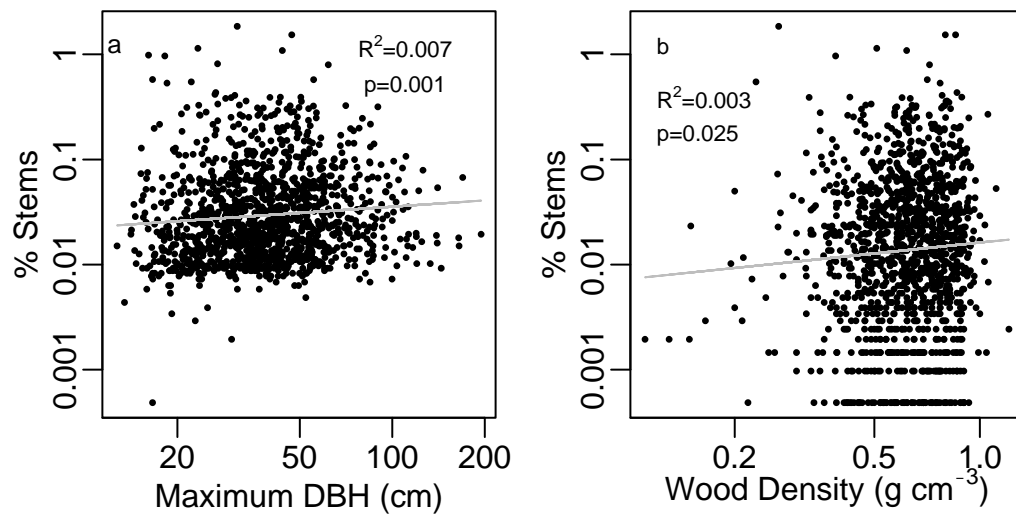

**Supplementary Figure 1.** Relationships between % contribution of species to stems and functional traits. **(a)** maximum  $D$  ( $n = 1319$ ), **(b)** wood density ( $n = 1303$ ). Regression models are plotted with grey lines. Plotted on log scale.

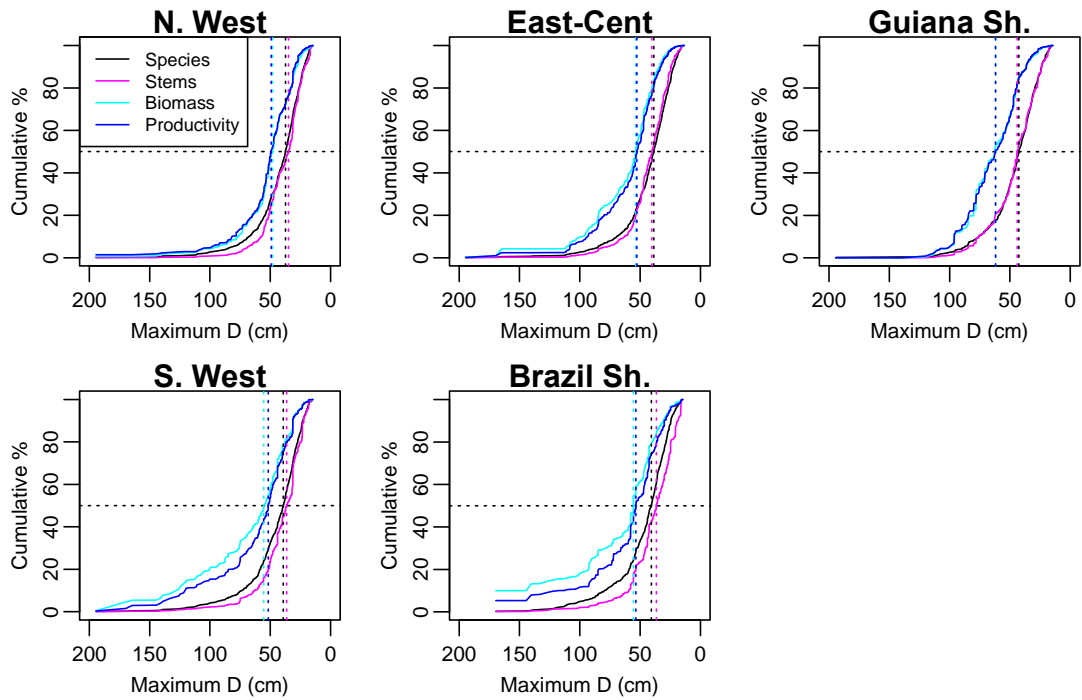

**Supplementary Figure 2.** Cumulative % contribution to species, stems, biomass and productivity ordered by maximum  $D$ . Horizontal dashed black lines represent the mid-point of all metrics, vertical dashed lines show the trait value at the mid-point of each metric. All curves are based on the productivity plot datasets.

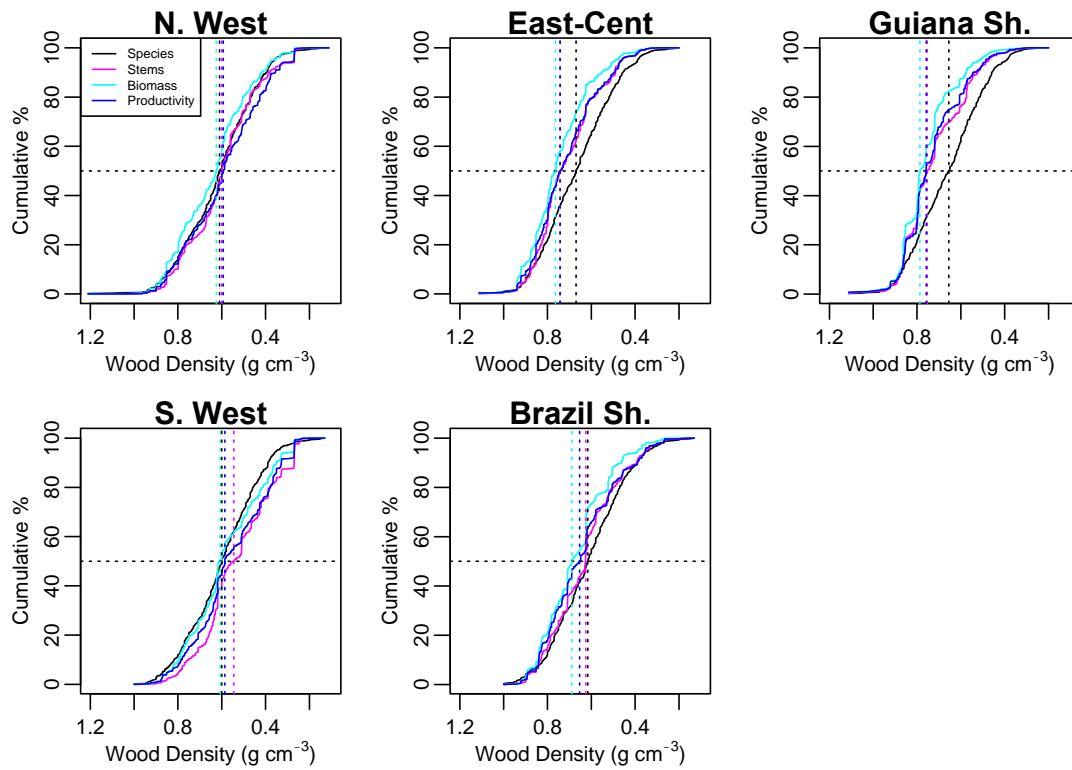

**Supplementary Figure 3.** Cumulative % contribution to species, stems, biomass and productivity ordered by wood density. (a) North western Amazonia, (b) East-central Amazonia, (c) Guiana shield, (d) South western Amazonia, (e) Brazilian shield. Horizontal dashed black lines represent the mid-point of all metrics, vertical dashed lines show the trait value at the mid-point of each metric. All curves are based on the productivity plot datasets.

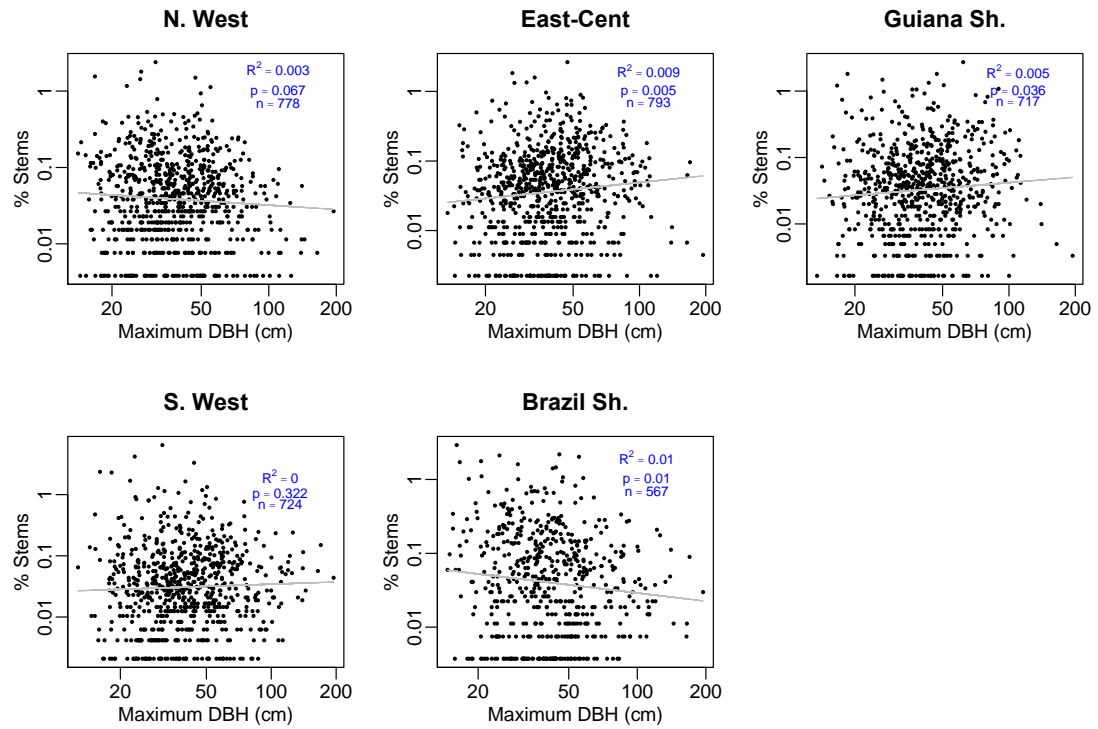

**Supplementary Figure 4.** Relationships between % contribution of species to stems and maximum *D* in five Amazon regions. Regression models are plotted with grey lines. Plotted on log scale.

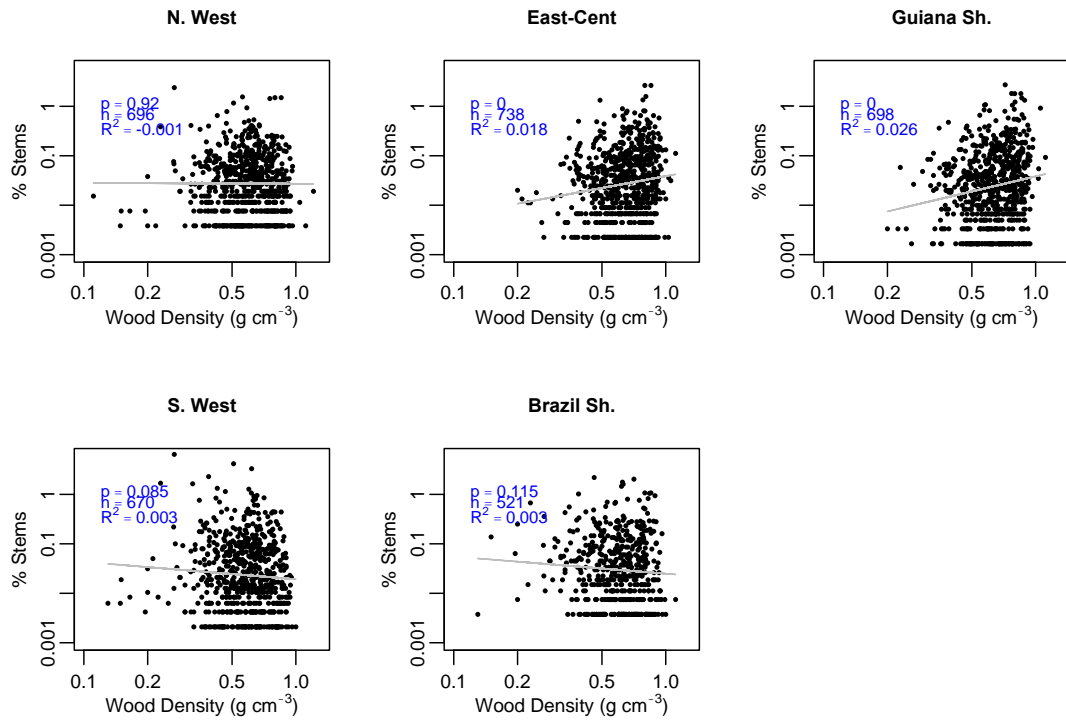

**Supplementary Figure 5.** Relationships between % contribution of species to stems and wood density in five Amazon regions. Regression models are plotted with grey lines. Plotted on log scale.

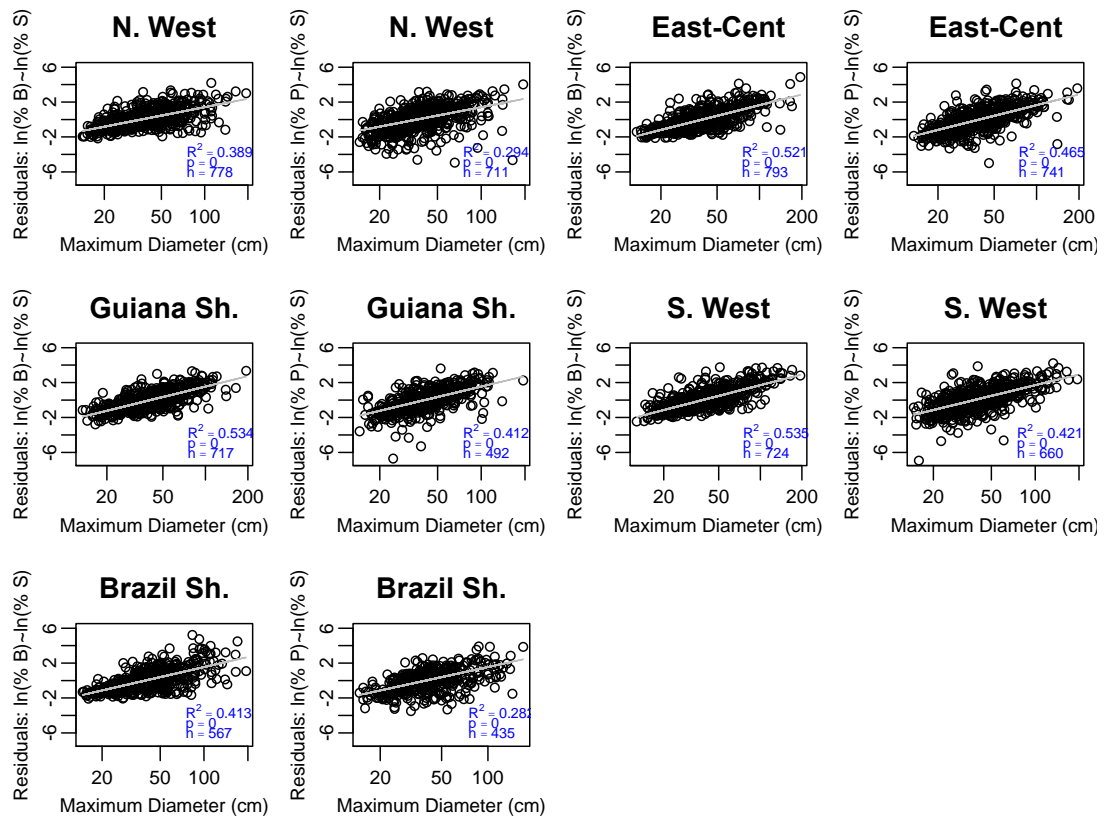

**Supplementary Figure 6.** Patterns of biomass and productivity contributions after controlling for stem abundance with maximum  $D$ . Relationships between the residuals from  $\ln(\% \text{ contribution to biomass}) = a + b \cdot \ln(\% \text{ contribution to stem number})$  and  $\ln(\% \text{ contribution to productivity}) = a + b \cdot \ln(\% \text{ contribution to stem number with maximum } D)$  for five Amazon regions. Regression models are plotted with grey lines.

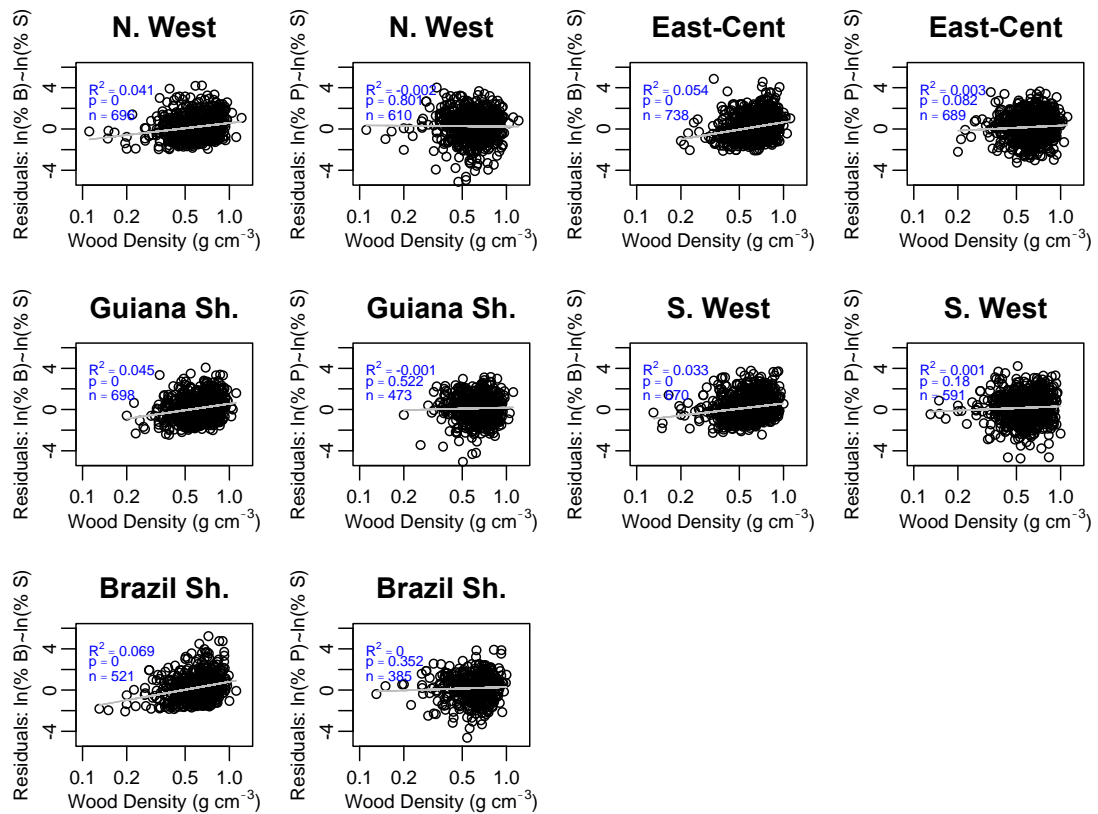

**Supplementary Figure 7.** Patterns of biomass and productivity contributions after controlling for stem abundance with wood density. Relationships between the residuals from  $\ln(\% \text{ contribution to biomass}) = a + b \cdot \ln(\% \text{ contribution to stem number})$  and  $\ln(\% \text{ contribution to productivity}) = a + b \cdot \ln(\% \text{ contribution to stem number})$  with wood density for five Amazon regions. Regression models are plotted with grey lines.

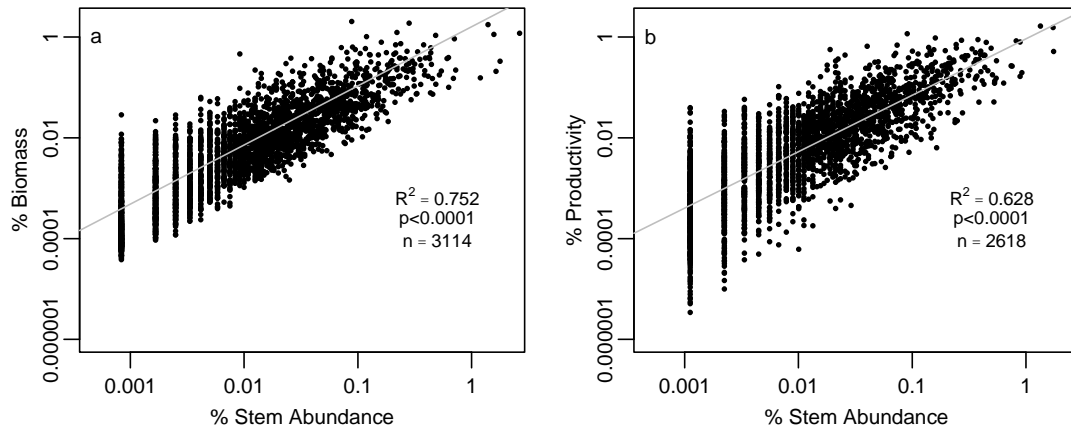

**Supplementary Figure 8.** Relationships between % contribution of species to stems and % contribution to **(a)** biomass and **(b)** productivity using data only from plots with at least 80 % of stems identified. Regression models are plotted with grey lines. Regression equation for % contribution to biomass:  $\log(\% \text{ biomass}) = 0.20 + 1.17 \log(\% \text{ stem})$ , regression equation for productivity:  $\log(\% \text{ biomass}) = -0.04 + 1.12 \log(\% \text{ stem})$ . All plots (326) are used for **(a)**, and the reduced productivity dataset (148 plots) are used for **(b)**. 77 species with negative or 0 productivity were excluded from **(b)**. Plotted on log scale.



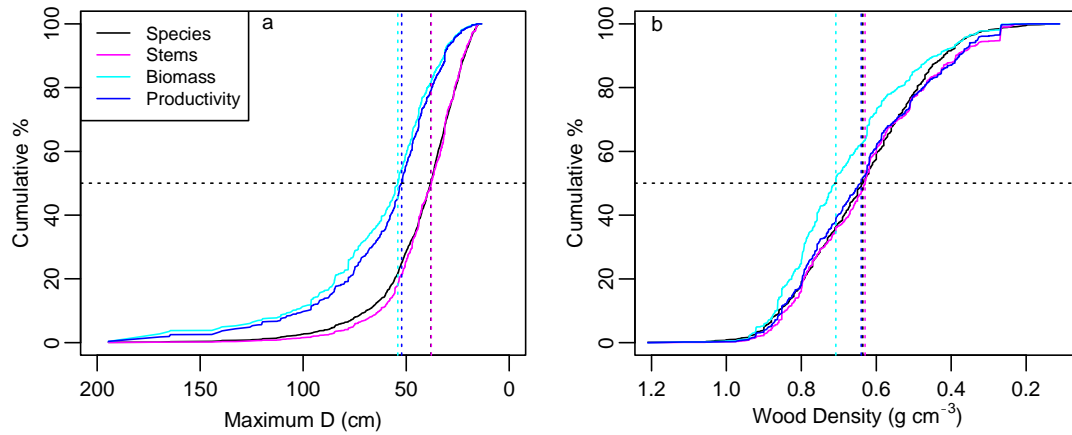

**Supplementary Figure 9.** Cumulative % contribution to species, stems, biomass and productivity against **(a)** maximum  $D$  and **(b)** wood density, using plots with at least 80 % of stems identified to species. Horizontal dashed black lines represent the mid-point of all metrics, vertical dashed lines show the trait value at the mid-point of each metric. All curves are based on the reduced productivity dataset, curves for biomass and stems are very similar when using the full dataset (data not shown).

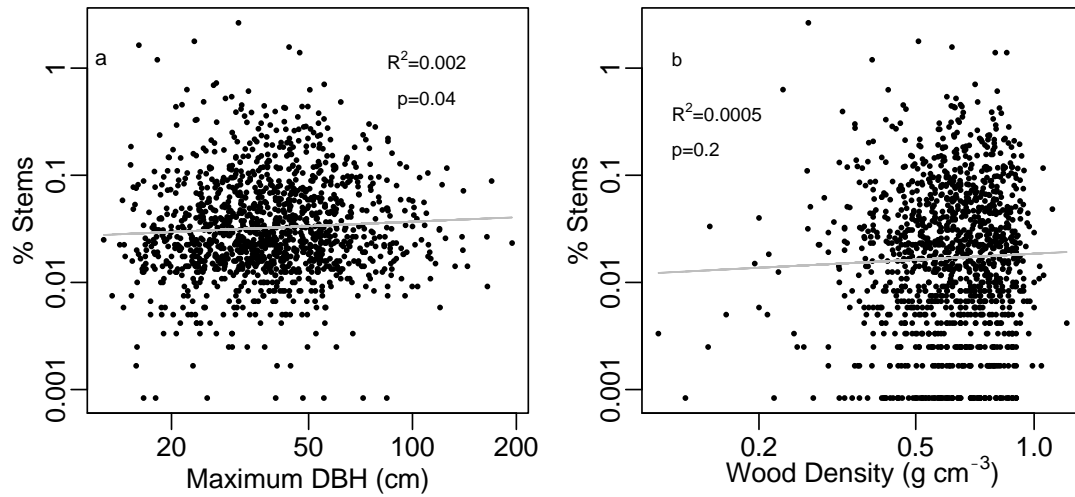

**Supplementary Figure 10.** Relationships between % contribution of species to stems with (a) maximum D ( $n = 1296$ ) and (b) wood density ( $n = 1238$ ), using plots with at least 80 % of stems identified to species. Regression models are plotted with grey lines. Plotted on log scale.

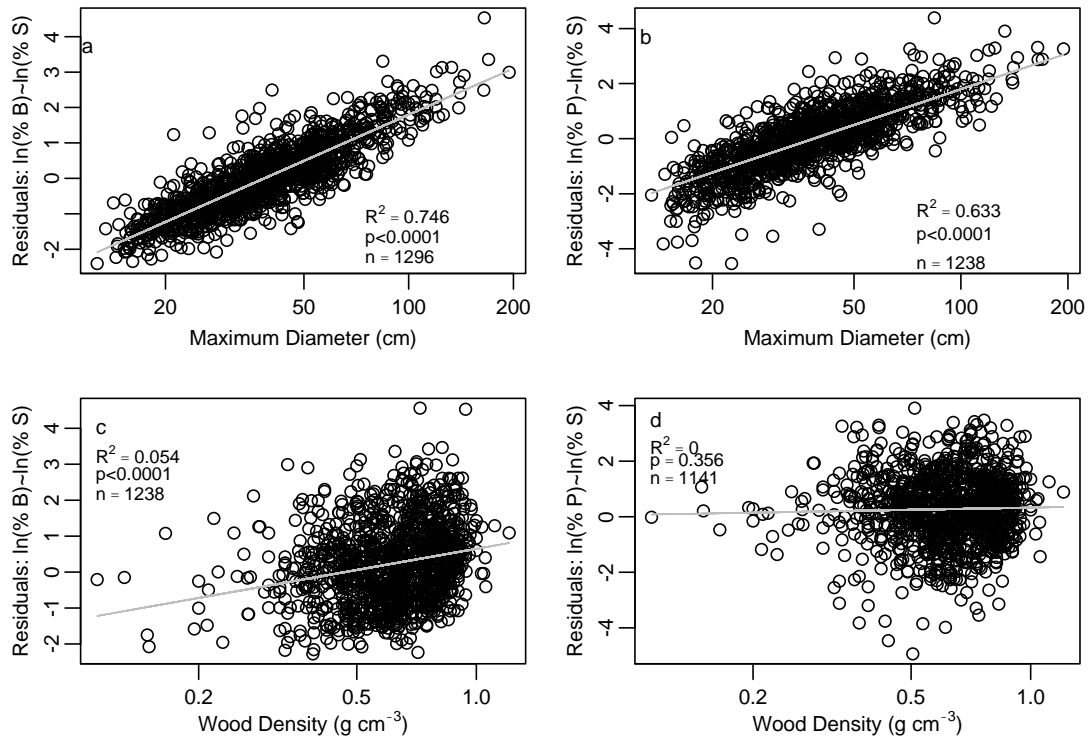

**Supplementary Figure 11.** Relationships between the residuals from  $\ln(\% \text{ contribution to biomass}) = a + b * \ln(\% \text{ contribution to stem number})$  and maximum D (a) and wood density (c), relationships between the residuals from  $\ln(\% \text{ contribution to productivity}) = a + b * \ln(\% \text{ contribution to stem number})$  with maximum D (b) and wood density (d). Regression models are plotted with grey lines. Maximum diameter and wood density plotted on a log scale.

## Supplementary Tables

**Supplementary Table 1.** Top 20 species by stem number.

| Family           | Species                          | Stems | % total stems | Cumulative % of total stems |
|------------------|----------------------------------|-------|---------------|-----------------------------|
| Areaceae         | <i>Iriartea deltoidea</i>        | 3814  | 1.85          | 1.85                        |
| Lecythidaceae    | <i>Eschweilera coriacea</i>      | 3168  | 1.54          | 3.39                        |
| Areaceae         | <i>Astrocaryum murumuru</i>      | 2354  | 1.14          | 4.53                        |
| Moraceae         | <i>Pseudolmedia laevis</i>       | 2243  | 1.09          | 5.62                        |
| Strelitziaceae   | <i>Phenakospermum guyannense</i> | 2032  | 0.99          | 6.60                        |
| Areaceae         | <i>Euterpe precatoria</i>        | 1991  | 0.97          | 7.57                        |
| Areaceae         | <i>Oenocarpus bataua</i>         | 1675  | 0.81          | 8.38                        |
| Fabaceae         | <i>Eperua falcata</i>            | 1644  | 0.80          | 9.18                        |
| Areaceae         | <i>Euterpe oleracea</i>          | 1189  | 0.58          | 9.76                        |
| Burseraceae      | <i>Tetragastris altissima</i>    | 1187  | 0.58          | 10.33                       |
| Areaceae         | <i>Socratea exorrhiza</i>        | 1129  | 0.55          | 10.88                       |
| Annonaceae       | <i>Oxandra asbeckii</i>          | 1097  | 0.53          | 11.41                       |
| Lecythidaceae    | <i>Lecythis persistens</i>       | 894   | 0.43          | 11.85                       |
| Burseraceae      | <i>Protium hebetatum</i>         | 857   | 0.42          | 12.26                       |
| Violaceae        | <i>Rinorea guianensis</i>        | 841   | 0.41          | 12.67                       |
| Myristicaceae    | <i>Otoba parvifolia</i>          | 809   | 0.39          | 13.06                       |
| Chrysobalanaceae | <i>Licania alba</i>              | 808   | 0.39          | 13.45                       |
| Areaceae         | <i>Attalea butyracea</i>         | 802   | 0.39          | 13.84                       |
| Violaceae        | <i>Leonia glycycarpa</i>         | 799   | 0.39          | 14.23                       |
| Myristicaceae    | <i>Iryanthera juruensis</i>      | 785   | 0.38          | 14.61                       |

**Supplementary Table 2.** Top 20 species by Productivity (reduced dataset).

| Family        | Species                        | Productivity (Mg/yr) | % total productivity | Cumulative % productivity |
|---------------|--------------------------------|----------------------|----------------------|---------------------------|
| Arecaceae     | <i>Iriartea deltoidea</i> *    | 23.8                 | 1.93                 | 1.93                      |
| Lecythidaceae | <i>Eschweilera coriacea</i>    | 23.5                 | 1.90                 | 3.84                      |
| Moraceae      | <i>Pseudolmedia laevis</i>     | 15.7                 | 1.28                 | 5.12                      |
| Lecythidaceae | <i>Bertholletia excelsa</i>    | 10.9                 | 0.88                 | 6.00                      |
| Fabaceae      | <i>Vouacapoua americana</i>    | 10.3                 | 0.84                 | 6.84                      |
| Burseraceae   | <i>Tetragastris altissima</i>  | 9.8                  | 0.79                 | 7.64                      |
| Arecaceae     | <i>Attalea butyracea</i> *     | 8.6                  | 0.70                 | 8.33                      |
| Fabaceae      | <i>Eperua falcata</i>          | 8.1                  | 0.65                 | 8.99                      |
| Fabaceae      | <i>Dicymbe altsonii</i>        | 8.0                  | 0.65                 | 9.64                      |
| Goupiaceae    | <i>Goupia glabra</i>           | 7.9                  | 0.64                 | 10.28                     |
| Myristicaceae | <i>Otoba parvifolia</i>        | 7.7                  | 0.62                 | 10.90                     |
| Sapotaceae    | <i>Manilkara huberi</i>        | 7.5                  | 0.61                 | 11.51                     |
| Lauraceae     | <i>Chlorocardium rodiei</i>    | 7.4                  | 0.60                 | 12.12                     |
| Apocynaceae   | <i>Aspidosperma excelsum</i>   | 7.3                  | 0.59                 | 12.71                     |
| Fabaceae      | <i>Tachigali poeppigiana</i>   | 7.2                  | 0.59                 | 13.29                     |
| Fabaceae      | <i>Dicorynia guianensis</i>    | 6.6                  | 0.54                 | 13.83                     |
| Fabaceae      | <i>Inga alba</i>               | 6.4                  | 0.52                 | 14.35                     |
| Fabaceae      | <i>Cedrelinga cateniformis</i> | 6.2                  | 0.51                 | 14.86                     |
| Fabaceae      | <i>Swartzia polyphylla</i>     | 6.1                  | 0.50                 | 15.36                     |
| Moraceae      | <i>Brosimum rubescens</i>      | 5.9                  | 0.48                 | 15.84                     |

\* identifies monocot species for which productivity was estimated based on necromass production rather than biomass growth.

**Supplementary Table 3.** Contributions to total stems, biomass and productivity from largest and most densely wooded 50 % of species for five Amazon regions.

| Region<br>(Median Max <i>D</i> (cm);<br>Median Wood<br>Density (g cm <sup>-3</sup> )) |              | %<br>contribution<br>by largest 50<br>% of species | Maximum <i>D</i><br>at 50 % of<br>metric (cm) | %<br>contribution<br>by 50 % most<br>densely<br>wooded<br>species | Wood density<br>at 50 % of<br>metric (g cm <sup>-3</sup> ) |
|---------------------------------------------------------------------------------------|--------------|----------------------------------------------------|-----------------------------------------------|-------------------------------------------------------------------|------------------------------------------------------------|
| North West (37.3;<br>0.61)                                                            | Stems        | 45.5                                               | 34.9                                          | 46.9                                                              | 0.60                                                       |
|                                                                                       | Biomass      | 72.2                                               | 48.1                                          | 54.6                                                              | 0.62                                                       |
|                                                                                       | Productivity | 72.5                                               | 49.2                                          | 44.4                                                              | 0.59                                                       |
| South West (39.3;<br>0.60)                                                            | Stems        | 44.8                                               | 36.3                                          | 39.4                                                              | 0.55                                                       |
|                                                                                       | Biomass      | 78.5                                               | 55.4                                          | 50.5                                                              | 0.61                                                       |
|                                                                                       | Productivity | 75.6                                               | 51.7                                          | 44.3                                                              | 0.59                                                       |
| Guiana Shield (42.6;<br>0.65)                                                         | Stems        | 52.6                                               | 44.0                                          | 69.8                                                              | 0.75                                                       |
|                                                                                       | Biomass      | 84.9                                               | 62.0                                          | 82.4                                                              | 0.79                                                       |
|                                                                                       | Productivity | 84.4                                               | 62.0                                          | 74.9                                                              | 0.76                                                       |
| East-Central (38.6;<br>0.67)                                                          | Stems        | 53.4                                               | 40.3                                          | 62.0                                                              | 0.74                                                       |
|                                                                                       | Biomass      | 83.1                                               | 53.7                                          | 73.5                                                              | 0.76                                                       |
|                                                                                       | Productivity | 80.2                                               | 52.6                                          | 65.4                                                              | 0.74                                                       |
| Brazilian Shield<br>(40.7; 0.62)                                                      | Stems        | 42.0                                               | 36.5                                          | 59.6                                                              | 0.63                                                       |
|                                                                                       | Biomass      | 79.2                                               | 55.5                                          | 71.8                                                              | 0.69                                                       |
|                                                                                       | Productivity | 73.9                                               | 53.5                                          | 63.7                                                              | 0.65                                                       |

**Supplementary Table 4.** Number of stem, biomass and productivity hyperdominant species using only plots with at least 80 % of stems identified to species.

|                                              | Full Dataset    |         | Productivity Dataset |         |              |
|----------------------------------------------|-----------------|---------|----------------------|---------|--------------|
|                                              | Stem<br>Numbers | Biomass | Stem<br>Numbers      | Biomass | Productivity |
| Number<br>hyperdominant<br>species           | 194             | 138     | 186                  | 124     | 141          |
| % of species<br>classed as<br>hyperdominant  | 6.2             | 4.4     | 6.7                  | 4.5     | 5.2          |
| % accounted for<br>by stem<br>hyperdominants | 50.0            | 44.0    | 50.0                 | 44.0    | 42.0         |

The full dataset figures are based on 326 plots and productivity dataset figures are based on 148 multicensus plots.

**Supplementary Table 5.** Top 20 most abundant species by above ground woody biomass using only plots with at least 80 % of stems identified to species.

| Family         | Species                        | Biomass | % total biomass | Cumulative % of biomass | Rank Stems | Rank Productivity |
|----------------|--------------------------------|---------|-----------------|-------------------------|------------|-------------------|
| Lecythidaceae  | <i>Bertholletia excelsa</i>    | 1245    | 2.04            | 2.04                    | 215        | 4                 |
| Lauraceae      | <i>Chlorocardium rodiei</i>    | 1152    | 1.88            | 3.92                    | 44         | 6                 |
| Lecythidaceae  | <i>Eschweilera coriacea</i>    | 1076    | 1.76            | 5.69                    | 5          | 2                 |
| Goupiaceae     | <i>Goupia glabra</i>           | 752     | 1.23            | 6.92                    | 62         | 19                |
| Arecaceae      | <i>Iriartea deltoidea</i>      | 726     | 1.19            | 8.10                    | 1          | 1                 |
| Moraceae       | <i>Pseudolmedia laevis</i>     | 688     | 1.13            | 9.24                    | 4          | 3                 |
| Fabaceae       | <i>Eperua falcata</i>          | 658     | 1.08            | 10.31                   | 16         | 16                |
| Fabaceae       | <i>Dicymbe altsonii</i>        | 623     | 1.02            | 11.33                   | 143        | 5                 |
| Burseraceae    | <i>Tetragastris altissima</i>  | 562     | 0.92            | 12.25                   | 8          | 9                 |
| Elaeocarpaceae | <i>Sloanea guianensis</i>      | 483     | 0.79            | 13.05                   | 100        | 28                |
| Vochysiaceae   | <i>Qualea paraensis</i>        | 452     | 0.74            | 13.79                   | 55         | 14                |
| Apocynaceae    | <i>Aspidosperma excelsum</i>   | 428     | 0.70            | 14.49                   | 66         | 11                |
| Moraceae       | <i>Brosimum rubescens</i>      | 428     | 0.70            | 15.19                   | 28         | 21                |
| Sapotaceae     | <i>Manilkara huberi</i>        | 387     | 0.63            | 15.82                   | 207        | 22                |
| Fabaceae       | <i>Cedrelinga cateniformis</i> | 379     | 0.62            | 16.44                   | 281        | 12                |
| Arecaceae      | <i>Attalea phalerata</i>       | 374     | 0.61            | 17.05                   | 20         | 36                |
| Euphorbiaceae  | <i>Hura crepitans</i>          | 361     | 0.59            | 17.65                   | 152        | 32                |
| Moraceae       | <i>Brosimum alicastrum</i>     | 346     | 0.57            | 18.21                   | 193        | 39                |
| Lecythidaceae  | <i>Eschweilera sagotiana</i>   | 319     | 0.52            | 18.73                   | 48         | 43                |
| Olacaceae      | <i>Minquartia guianensis</i>   | 311     | 0.51            | 19.24                   | 32         | 42                |

Productivity ranks are based on the 148 plot productivity dataset.

**Supplementary Table 6.** Top 20 species by stem number using only plots with at least 80 % of stems identified to species.

| <b>Family</b>  | <b>Species</b>                   | <b>Stems</b> | <b>% total stems</b> | <b>Cumulative % of total stems</b> |
|----------------|----------------------------------|--------------|----------------------|------------------------------------|
| Arecaceae      | <i>Iriartea deltoidea</i>        | 3178         | 2.65                 | 2.64                               |
| Arecaceae      | <i>Astrocaryum murumuru</i>      | 2138         | 1.78                 | 4.43                               |
| Strelitziaceae | <i>Phenakospermum guyannense</i> | 1968         | 1.64                 | 6.07                               |
| Moraceae       | <i>Pseudolmedia laevis</i>       | 1886         | 1.57                 | 7.64                               |
| Lecythidaceae  | <i>Eschweilera coriacea</i>      | 1676         | 1.40                 | 9.03                               |
| Arecaceae      | <i>Euterpe precatória</i>        | 1434         | 1.19                 | 10.23                              |
| Arecaceae      | <i>Oenocarpus bataua</i>         | 871          | 0.72                 | 10.95                              |
| Burseraceae    | <i>Tetragastris altissima</i>    | 848          | 0.71                 | 11.66                              |
| Burseraceae    | <i>Protium hebetatum</i>         | 832          | 0.69                 | 12.35                              |
| Arecaceae      | <i>Socratea exorrhiza</i>        | 756          | 0.63                 | 12.98                              |
| Myristicaceae  | <i>Otoba parvifolia</i>          | 753          | 0.63                 | 13.61                              |
| Lecythidaceae  | <i>Eschweilera wachenheimii</i>  | 731          | 0.61                 | 14.22                              |
| Violaceae      | <i>Leonia glycyarpa</i>          | 650          | 0.54                 | 14.76                              |
| Myristicaceae  | <i>Iryanthera juruensis</i>      | 626          | 0.52                 | 15.28                              |
| Euphorbiaceae  | <i>Sagotia brachysepala</i>      | 582          | 0.48                 | 15.76                              |
| Fabaceae       | <i>Eperua falcata</i>            | 580          | 0.48                 | 16.25                              |
| Arecaceae      | <i>Oenocarpus bacaba</i>         | 547          | 0.46                 | 16.70                              |
| Malvaceae      | <i>Quararibea wittii</i>         | 543          | 0.45                 | 17.15                              |
| Cannabaceae    | <i>Celtis schippii</i>           | 533          | 0.44                 | 17.60                              |
| Arecaceae      | <i>Attalea phalerata</i>         | 526          | 0.44                 | 18.04                              |



**Supplementary Table 7.** Top 20 species by above ground woody productivity using only plots with at least 80 % of stems identified to species.

| Family        | Species                        | Productivity | % total Productivity | Cumulative % of productivity |
|---------------|--------------------------------|--------------|----------------------|------------------------------|
| Arecaceae     | <i>Iriartea deltoidea</i> *    | 18.60        | 2.23                 | 2.23                         |
| Lecythidaceae | <i>Eschweilera coriacea</i>    | 13.77        | 1.65                 | 3.88                         |
| Moraceae      | <i>Pseudolmedia laevis</i>     | 12.86        | 1.54                 | 5.43                         |
| Lecythidaceae | <i>Bertholletia excelsa</i>    | 9.72         | 1.17                 | 6.59                         |
| Fabaceae      | <i>Dicymbe altsonii</i>        | 8.00         | 0.96                 | 7.55                         |
| Lauraceae     | <i>Chlorocardium rodiei</i>    | 7.44         | 0.89                 | 8.44                         |
| Fabaceae      | <i>Tachigali poeppigiana</i>   | 7.21         | 0.86                 | 9.31                         |
| Myristaceae   | <i>Otoba parvifolia</i>        | 7.01         | 0.84                 | 10.15                        |
| Burseraceae   | <i>Tetragastris altissima</i>  | 6.64         | 0.80                 | 10.95                        |
| Arecaceae     | <i>Attalea butyracea</i> *     | 6.55         | 0.79                 | 11.73                        |
| Apocynaceae   | <i>Aspidosperma excelsum</i>   | 5.92         | 0.71                 | 12.44                        |
| Fabaceae      | <i>Cedrelinga cateniformis</i> | 5.77         | 0.69                 | 13.13                        |
| Moraceae      | <i>Ficus coerulescens</i>      | 5.48         | 0.66                 | 13.79                        |
| Vochysiaceae  | <i>Qualea paraensis</i>        | 5.19         | 0.62                 | 14.41                        |
| Fabaceae      | <i>Anadenanthera colubrina</i> | 5.05         | 0.60                 | 15.02                        |
| Fabaceae      | <i>Eperua falcata</i>          | 5.01         | 0.60                 | 15.62                        |
| Moraceae      | <i>Poulsenia armata</i>        | 4.87         | 0.58                 | 16.20                        |
| Meliaceae     | <i>Swietenia macrophylla</i>   | 4.72         | 0.57                 | 16.77                        |
| Goupiaceae    | <i>Goupia glabra</i>           | 4.67         | 0.56                 | 17.33                        |
| Moraceae      | <i>Clarisia racemosa</i>       | 4.48         | 0.54                 | 17.87                        |

\* shows palm species where productivity estimates are based on necromass production.

**Supplementary Table 8.** Contributions to total stems, biomass and productivity from largest and most densely wooded 50 % of species using only plots with at least 80 % of stems identified to species.

|              | % contribution by largest 50 % of species | Maximum $D^a$ at 50 % of metric (cm) | % contribution by densest 50 % of species | Wood density <sup>b</sup> at 50 % of metric ( $\text{g cm}^{-3}$ ) |
|--------------|-------------------------------------------|--------------------------------------|-------------------------------------------|--------------------------------------------------------------------|
| Stems        | 49.1                                      | 37.8                                 | 48.0                                      | 0.630                                                              |
| Biomass      | 81.5                                      | 54.1                                 | 62.7                                      | 0.708                                                              |
| Productivity | 78.9                                      | 52.2                                 | 51.7                                      | 0.640                                                              |

<sup>a</sup> Median Max DBH species 38.0 cm

<sup>b</sup> Median WD species:  $0.636 \text{ g cm}^{-3}$
